# Supplementary material
Source: publisher figshare collection journal article supplement (https://brill.figshare.com/ndownloader/files/24613577)
Supplement: Supplementary file 1 [file 24613577]

Table 3 Territorial Sea Claims of 12 Miles or Less

(as at December 31, 2019)

**Three Miles (1) Six Miles (2)**

Jordana Greecea,e

Turkeyf

**Twelve Miles (149)**

Albaniaa

Algeriaa

Angolaa

Antigua and Barbudaa

Argentinaa

Australiaa,b,c

Bahamas, Thea

Bahraina

Bangladesha

Barbadosa

Belgiuma,b

Belizea,g

Benina

Brazila

Bruneia

Bulgariaa,b

Burmaa (Myanmar)

Cambodiab,c

Cameroona

Canadaa

Cape Verdea,h

Chilea

Chinaa

Colombia

Comorosa,h

Congoa

Cook Islandsa

Costa Ricaa,c

Côte d'Ivoirea

Croatiaa

Cubaa

Cyprusa,c

Democratic Rep. Congoa

Denmarka,b,c,d

Djiboutia

Dominicaa

Dominican Republica,b,c

Egypta

Equadora

El Salvador

Equatorial Guineaa

Eritrea

Estoniaa

Fijia,c,h

Finlanda,b,c,i

Francea,j

Gabona

Gambia, Thea

Georgiaa

Germanya,b,c,k

Ghanaa

Grenadaa

Guatemalaa,c

Guineaa

Guinea-Bissaua

Guyanaa

Haitia,b,c

Hondurasa

Icelanda

Indiaa

Indonesiaa,c,h

Iran

Iraqa

Irelanda

Israelc

Italya,b,c

Jamaicaa,b,c

Japana,b,c,l

Kenyaa,b,c

Kiribatia

Korea, North

Korea, Southa,m

Kuwaita

Latviaa

Lebanona

Liberiaa

Libya

Lithuaniaa

Madagascarb,c

Malaysiaa,b

Maldivesa

Maltaa,b

Marshall Islandsa

Mauritaniaa

Mauritiusa,b,c

Mexicoa,b,c

Micronesia, Fed. States ofa

Monacoa

Montenegroa

Moroccoa

Mozambiquea

Namibiaa

Naurua

Netherlandsa,b,c

New Zealanda,n

Nicaraguaa

Nigeriaa

Niuea

Norwaya

Omana

Pakistana

Palaua

Panamaa

Papua New Guineaa,h

Peru

Philippinesa

Polanda,c

Portugala,b,c

Qatara

Romaniaa,b,c

Russiaa,b,c

Saint Kitts and Nevisa

Saint Luciaa

Saint Vincent and the

Grenadinesa

Samoaa

Sao Tome & Principea,h

Saudi Arabiaa

Senegala,c

Seychellesa

Sierra Leonea

Sloveniaa

Singaporea

Solomon Islandsa,c,h

Somaliaa

South Africaa,b,c

Spaina,b,c

Sri Lankaa

Sudana

Surinamea

Swedena

Syria

Tanzaniaa

Thailanda,b,c

Timor-Lestea

Tongaa,b,c

Trinidad &

Tobagoa,b,c,h

Tunisiaa,b

Tuvalua

Ukrainea

United Arab Emirates

United Kingdoma,b,c,o

United Statesb,c,p

Uruguaya

Vanuatua,h

Venezuelab,c

Vietnama

Yemena

Zairea

_____________________________

a Party to 1982 LOS Convention.

b Party to 1958 Territorial Sea Convention.

c Party to 1958 High Seas Convention.

d Includes Greenland and the Faroe Islands.

e Greece claims a 10-mile territorial air space for the purpose of regulating civil aviation.

f In the Aegean Sea. Turkey claims a 12-mile territorial sea off its coast in the Black Sea and the Mediterranean Sea.

g From the mouth of the Sarstoon River to Ranguana Caye, Belize’s territorial sea is three miles; according to Belize’s Maritime Areas Act, 1992, the purpose of this limitation is “to provide a framework for the negotiation of a definitive agreement on territorial differences with the Republic of Guatemala”.

h Maritime limits are measured from claimed “archipelagic baselines” which generally connect the outermost points of outer islands or drying reefs.

i In the Gulf of Finland, the outer limit of the Finnish territorial sea is at no place closer to the midline than three miles, according to the Act 981/95 amending the Act on the Limits of the Territorial Waters of Finland.

j Includes all French overseas departments and dependencies.

k The Federal Republic of Germany and the German Democratic Republic unified on October 3, 1990.

l Japan’s territorial sea remains three miles in five international straits: Soya (LaPerouse), Tsugaru, Osumi, and Eastern and Western Channels of the Tsushima Strait.

m South Korea’s territorial sea remains three miles in the Korea Strait.

n Includes Tokelau.

o Includes Jersey, Bermuda, Cayman Islands, Falkland Islands, Isle of Man, St. Helena, Ascension, Triston de Cunha, South Georgia, South Sandwich Islands, and the Turks and Caicos Islands. The limit remains at three miles in Anguilla, Guernsey, British Indian Ocean Territory, British Virgin Islands, Gibraltar, Monserrat and Pitcairn.

p Includes Puerto Rico, US Virgin Islands, Navassa Island, American Samoa, Guam, Johnston Atoll, Palmyra Atoll, Midway Island, Wake Island, Jarvis Island, Kingman Reef, Howland Island, Baker Island, and the Northern Marianas.

**Sources:** US NTM 1(56)20; UK NTM 1(12)20; MCRM.

____________________________________________________________________
